# Supplementary material
Source: PubMed Central journal article supplement (PMC5392164)
Supplement: NIHMS840988-supplement-5.pdf [file NIHMS840988-supplement-5.pdf]

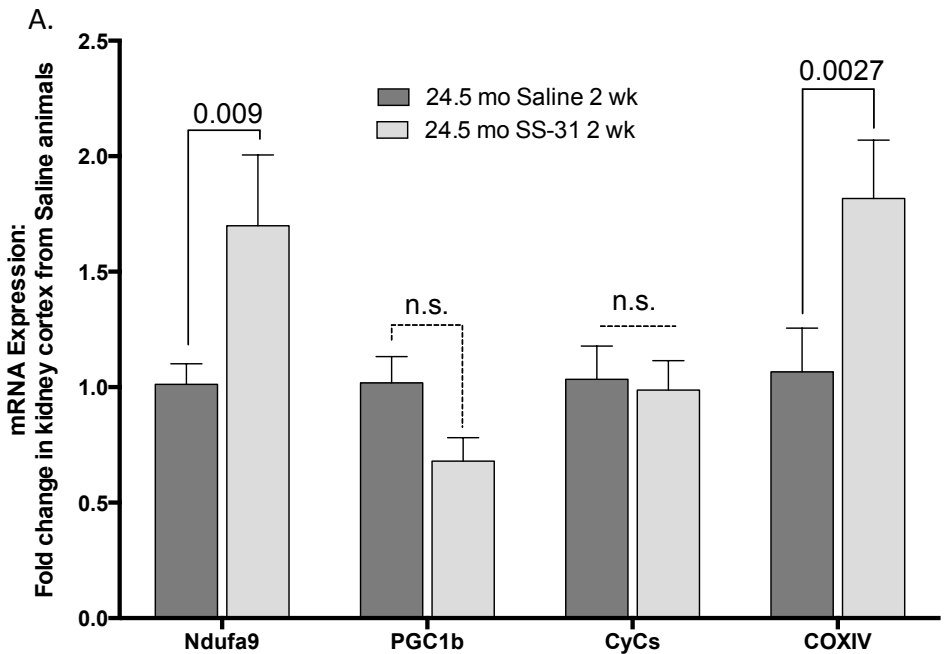

| Target                 | Forward 5'-3'         | Reverse 5'-3'         |
|------------------------|-----------------------|-----------------------|
| Ndufa9                 | ATCTTATTGGGCGGGAGTGG  | CAACCCAGCTTCCTTGGAT   |
| PGC1b (PMID: 25241037) | GGACGCCAGTGACTTTGACT  | TTCATCCAGTTCTGGGAAGG  |
| CyCs (PMID: 25241037)  | AAAGGGAGGCAAGCATAAGAC | GAACAGACCGTGGAGATTTGG |
| COXIV                  | CTCCAACGAATGGAAGACAG  | TGACAACCTTCTTAGGGAAC  |
| UBC                    | ACAGGAAGACAGACGTACCTT | CCCATCACACCCAAGAACAAG |

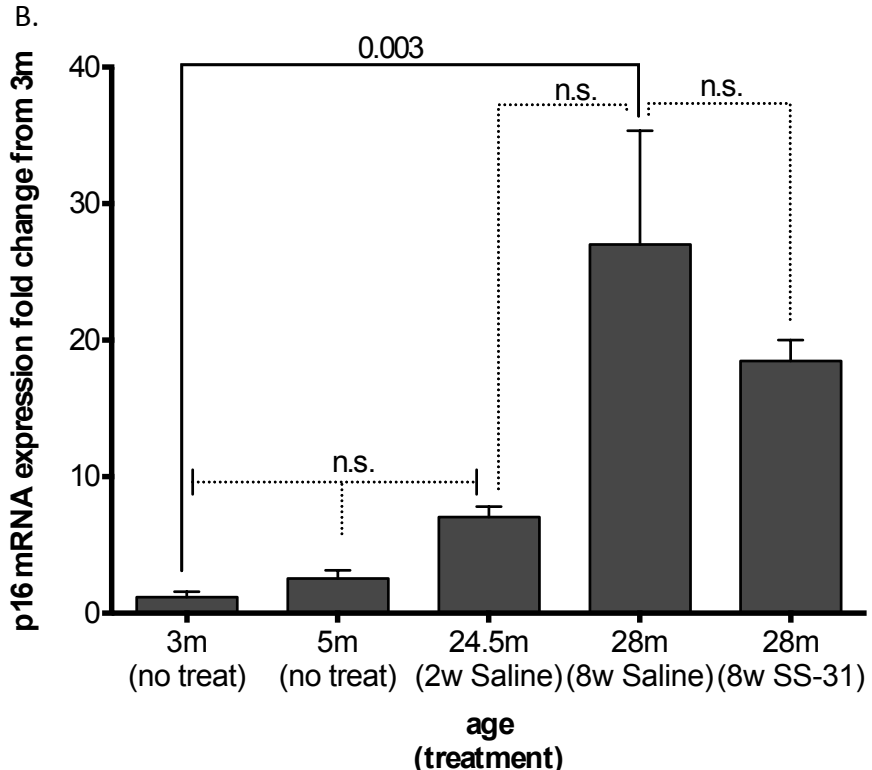

P16 Primer:  
 QuantiTech Primer  
 Assay  
 Mm\_Cdkn2a\_1\_SG,  
 Cat. No.:  
 QT00252595
