# Supplementary material
Source: PubMed Central journal article supplement (PMC5392164)

Supplemental Figure 1. Sweetwyne et al.

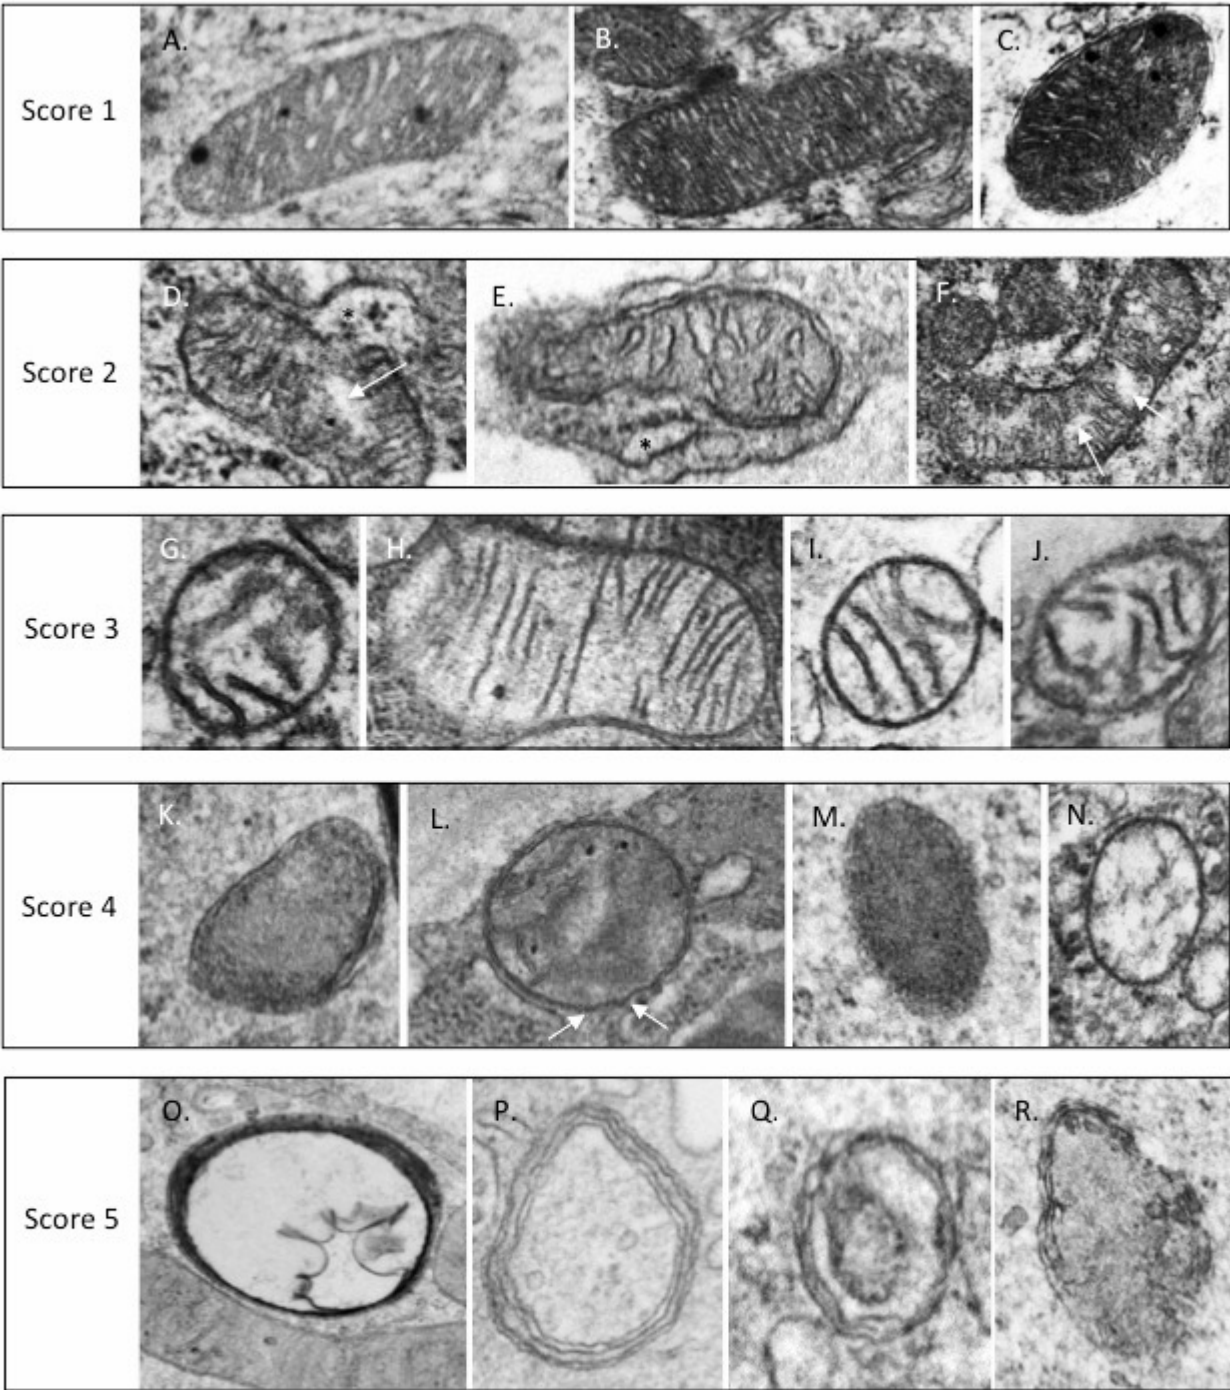

Supplement: NIHMS840988-supplement-1.pdf [file NIHMS840988-supplement-1.pdf]

26 months: 8 weeks saline

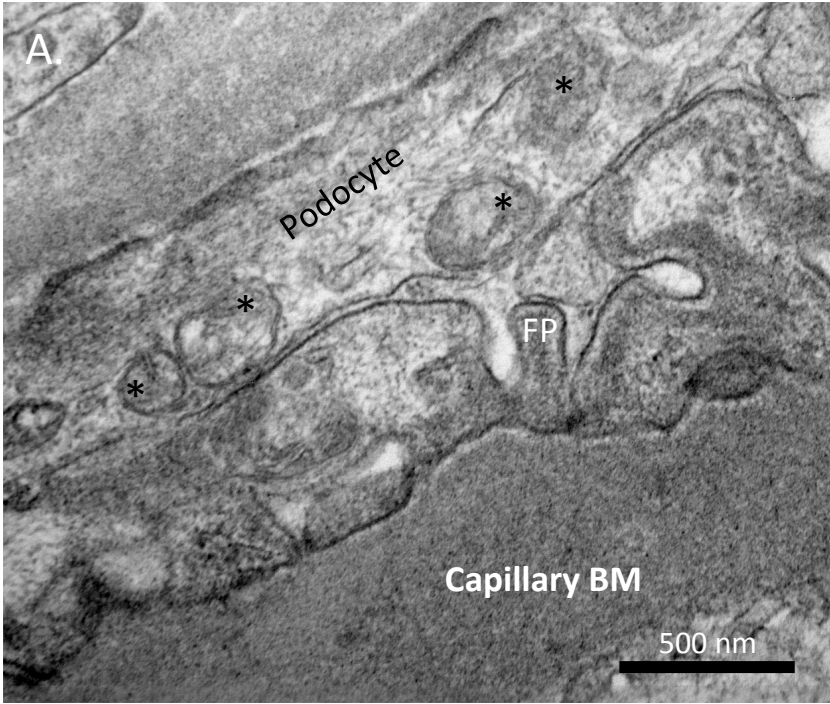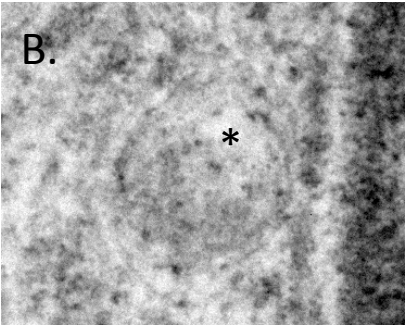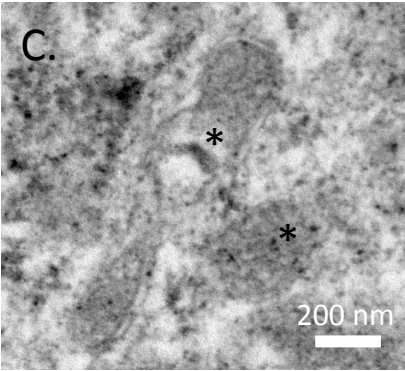

26 months: 8 weeks SS-31

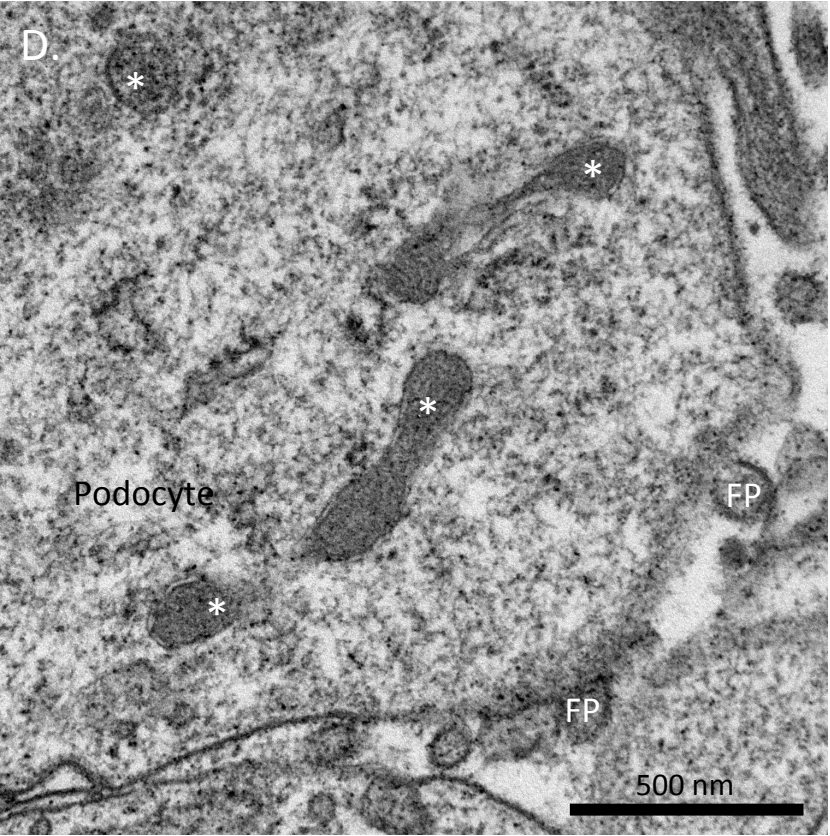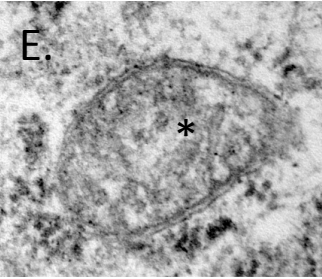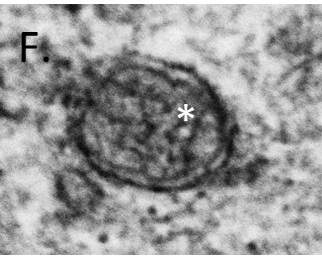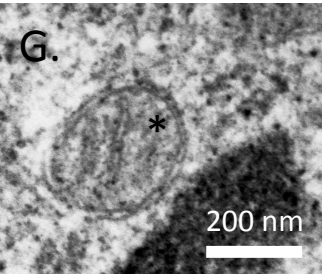

Supplement: NIHMS840988-supplement-2.pdf [file NIHMS840988-supplement-2.pdf]

A. 26 months: 8 weeks saline

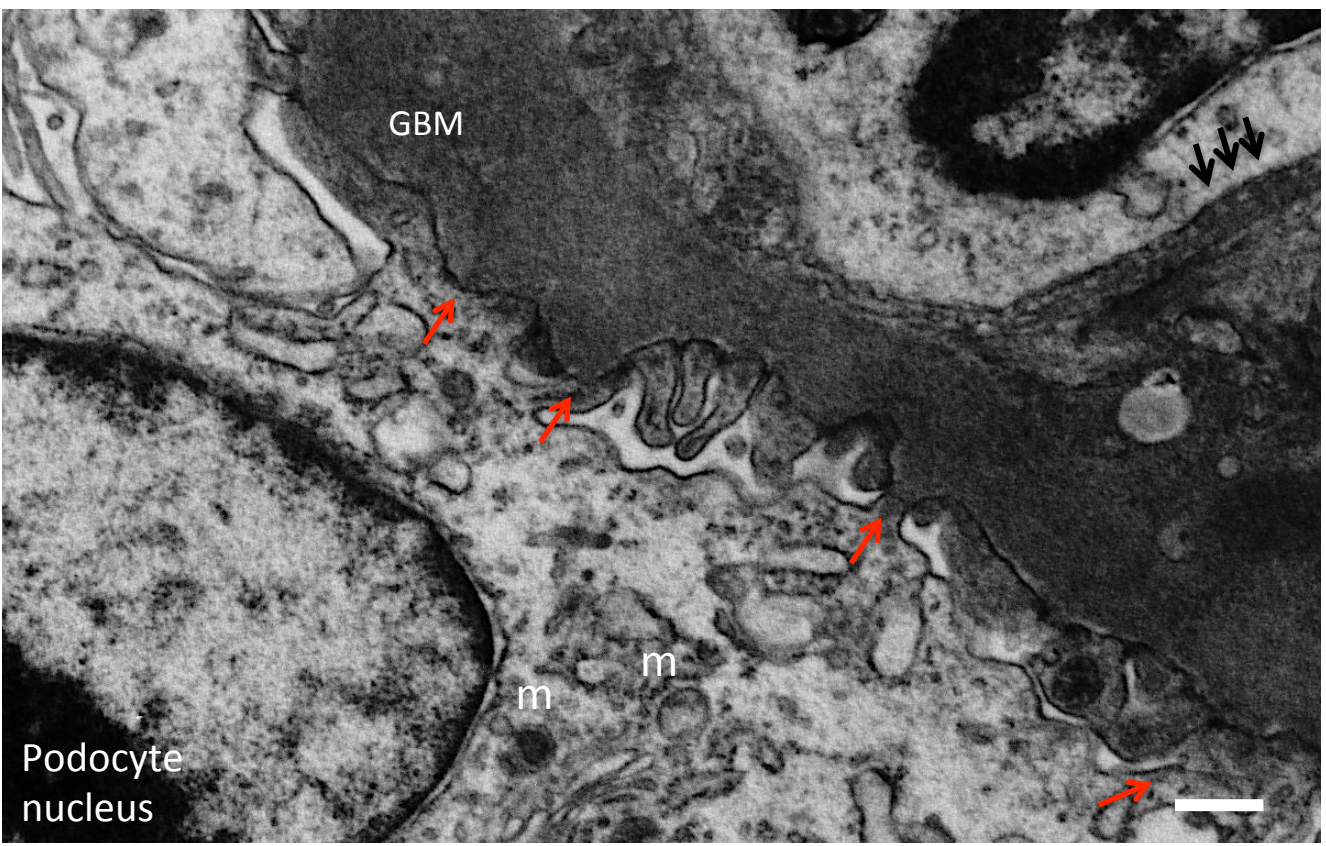

B. 26 months: 8 weeks SS-31

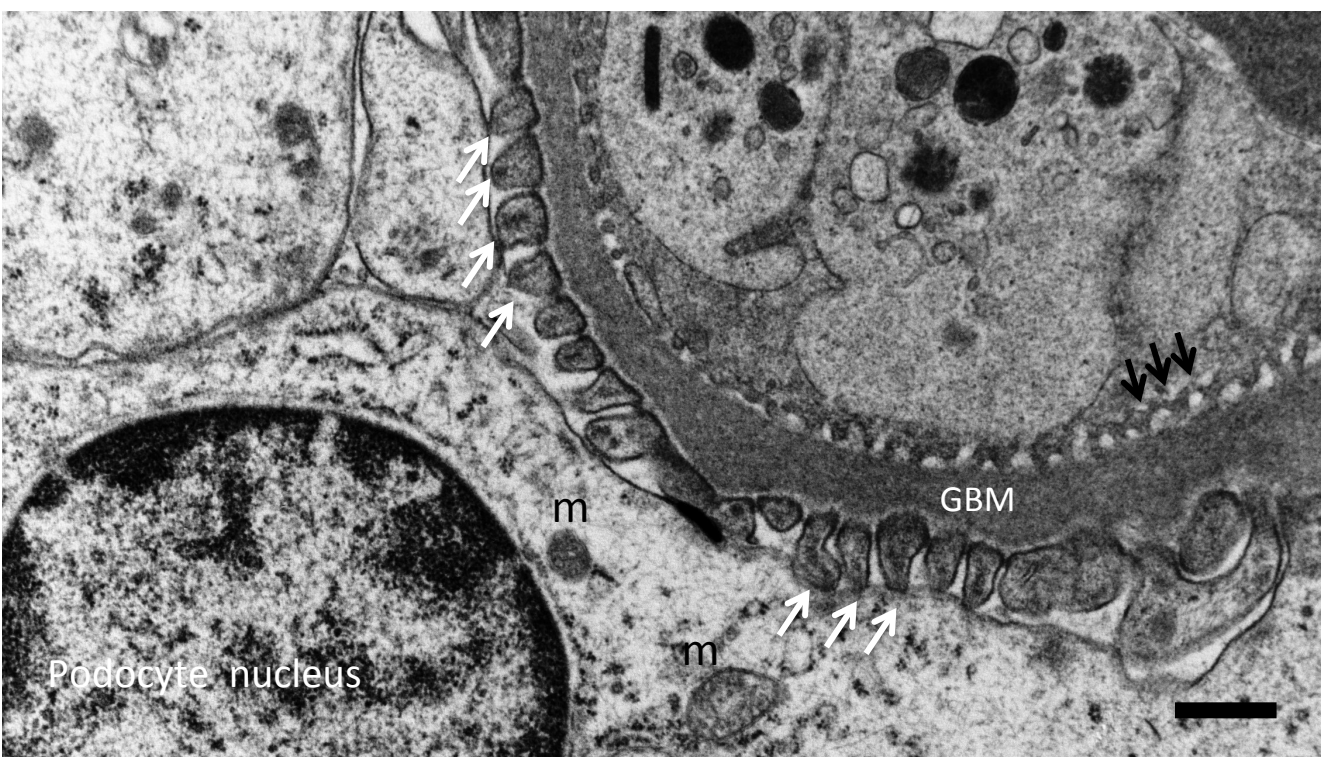

Supplement: NIHMS840988-supplement-3.pdf [file NIHMS840988-supplement-3.pdf]

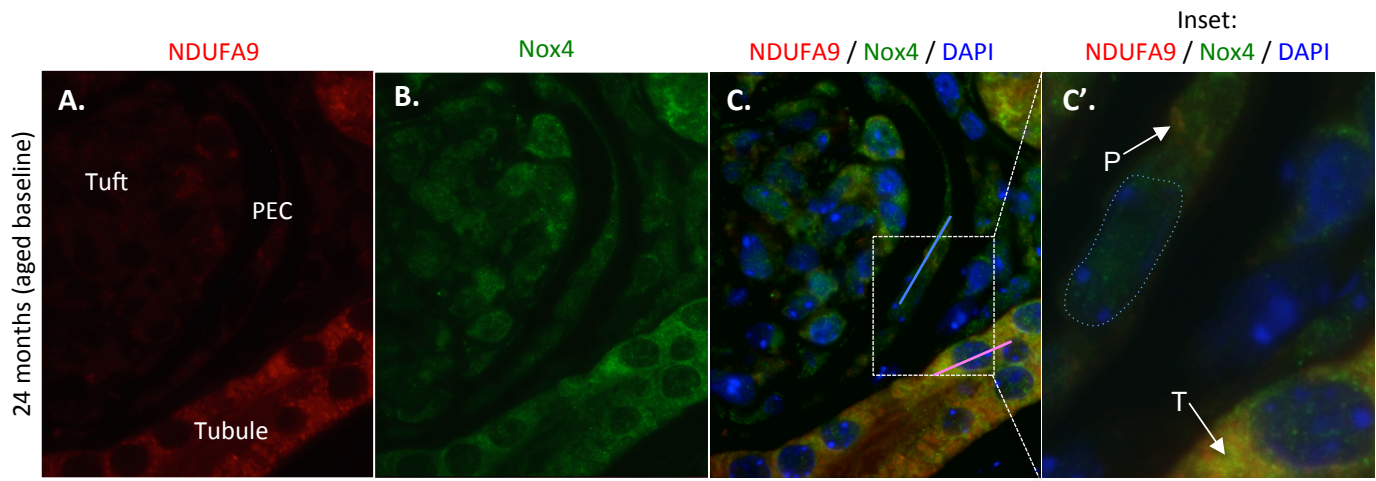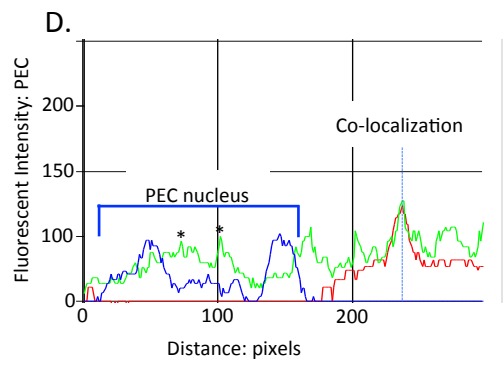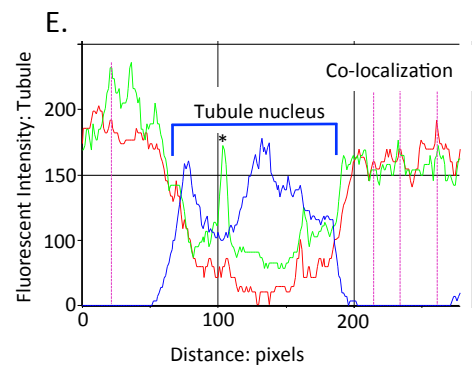

Supplement: NIHMS840988-supplement-4.pdf [file NIHMS840988-supplement-4.pdf]

Supplemental Figure 6. Sweetwyne et al.

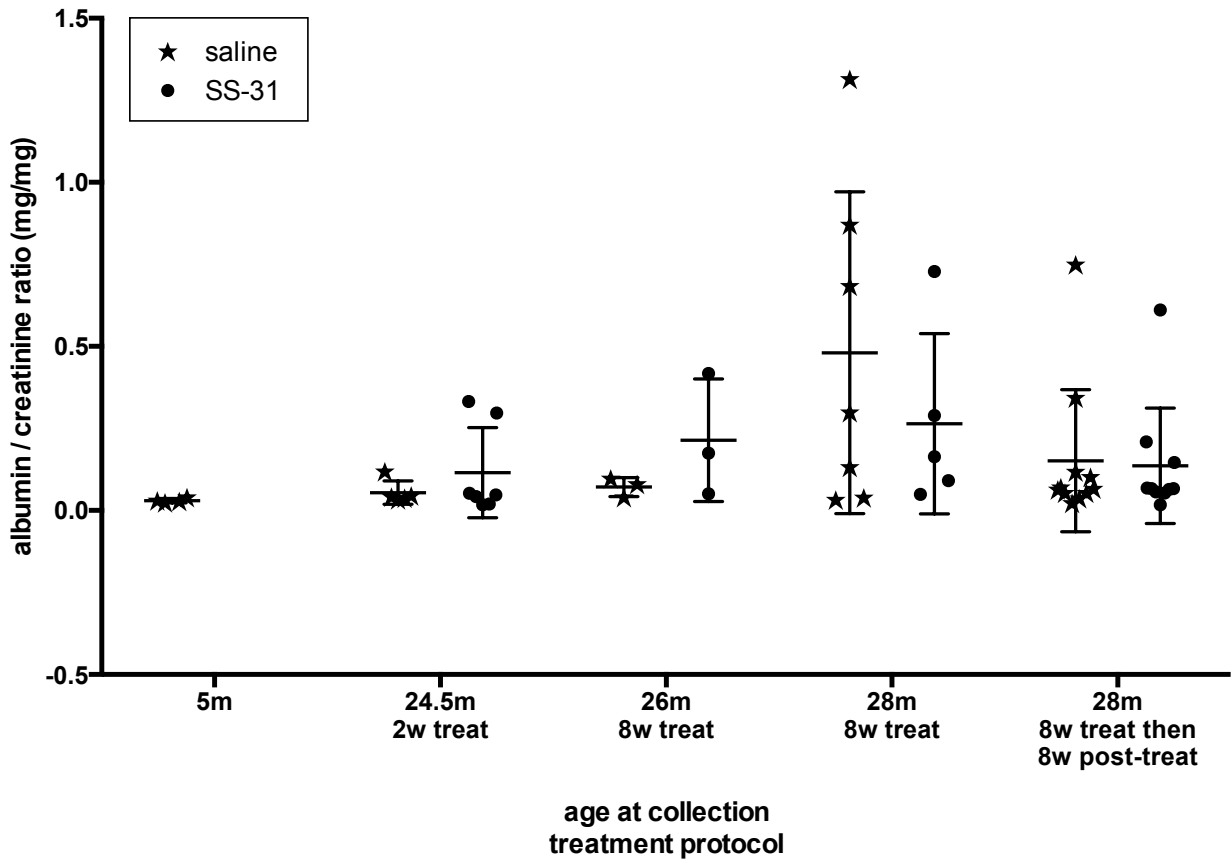

Supplement: NIHMS840988-supplement-6.pdf [file NIHMS840988-supplement-6.pdf]
